# Supplementary material
Source: Springer Nature journal article supplement (https://www.springermedizin.de/resource/supplementary/12943_2010_771_MOESM14_ESM.pdf/9554780)

# HepG2 s.c. xenograft

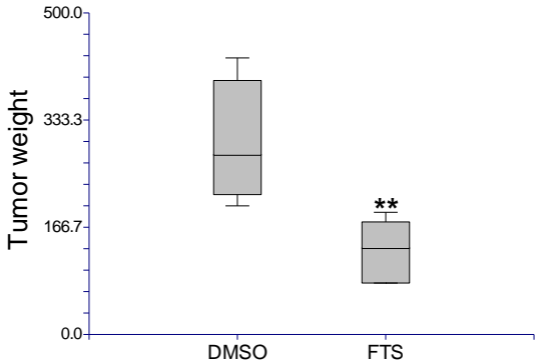

Supplement: MOESM14 [file 9554780]
